# Supplementary material
Source: PubMed Central journal article supplement (PMC2763120)
Supplement: NIHMS27622-supplement-1.pdf [file NIHMS27622-supplement-1.pdf]

# Supplementary Figure 1

A

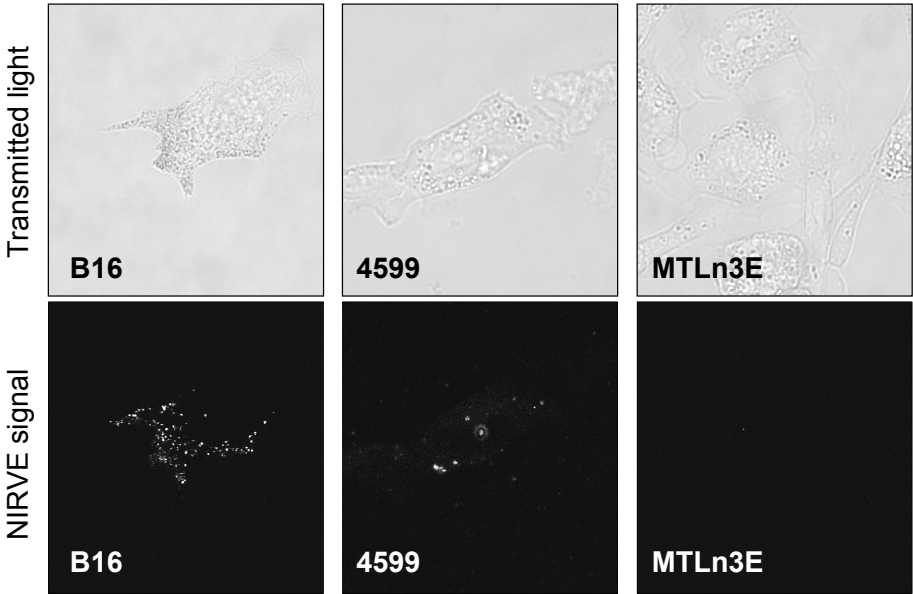

B

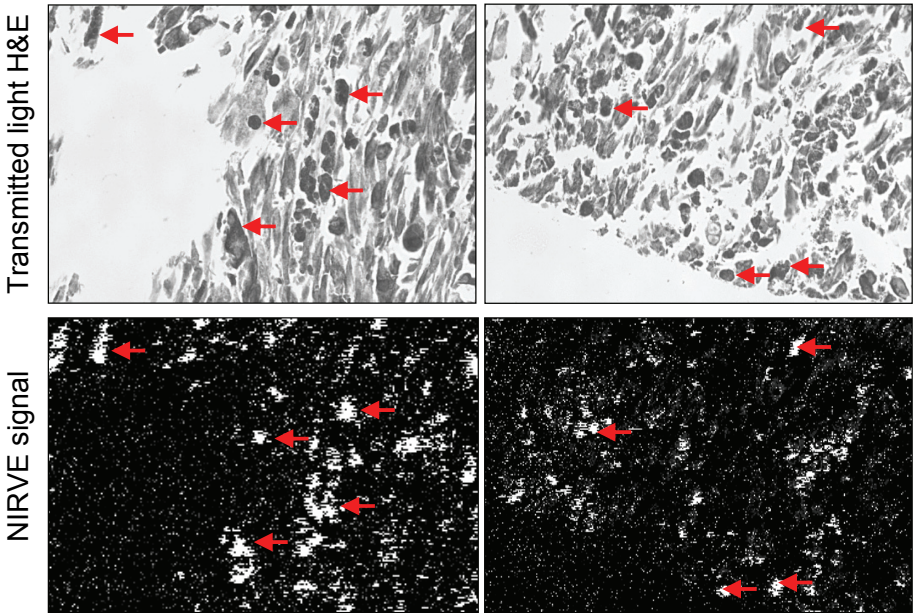

C

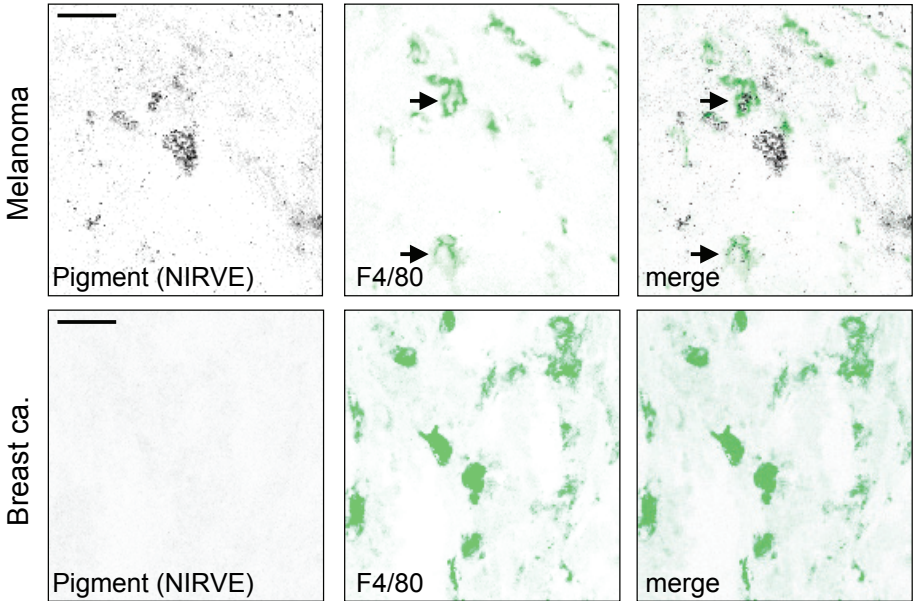

# Supplementary Figure 2

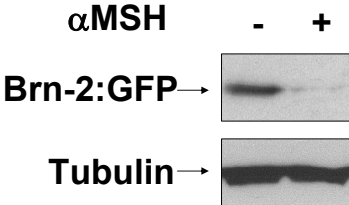



# Supplementary Table 1

| Mean fold change                 | Gene name                                                                             |
|----------------------------------|---------------------------------------------------------------------------------------|
| <b>Up in pigmented cells</b>     |                                                                                       |
| 3.49499981                       | RIKEN cDNA A130004G11 gene                                                            |
| 3.253531426                      | phosphatidylinositol glycan anchor biosynthesis, class C                              |
| 3.203391919                      | macrophage scavenger receptor 1                                                       |
| 3.074942594                      | predicted gene, EG214321                                                              |
| 2.803932736                      | ADP-ribosylation factor-like 15                                                       |
| 2.579357596                      | methyl-CpG binding domain protein 1                                                   |
| 2.492769541                      | ataxin 1                                                                              |
| 2.435398687                      | utrophin                                                                              |
| 2.433645158                      | CUG triplet repeat, RNA binding protein 2                                             |
| 2.353345464                      | expressed sequence C78441                                                             |
| 2.342984881                      | mitochondrial carrier homolog 2 (C. elegans)                                          |
| 2.333445831                      | forkhead box K2                                                                       |
| 2.29172782                       | RIKEN cDNA 5830474E16 gene                                                            |
| 2.268505136                      | amyloid beta (A4) precursor protein-binding, family B, member 2                       |
| 2.253053135                      | nuclear receptor subfamily 2, group C, member 2                                       |
| 2.236508536                      | retinitis pigmentosa 9 (human)                                                        |
| 2.219804237                      | Smg-6 homolog, nonsense mediated mRNA decay factor (C. elegans)                       |
| 2.186186495                      | like-glycosyltransferase                                                              |
| 2.146184519                      | melanoma antigen, family H, 1                                                         |
| 2.142588278                      | smoothened homolog (Drosophila)                                                       |
| 2.122154341                      | glutamine fructose-6-phosphate transaminase 1                                         |
| 2.077992981                      | cell growth regulator with ring finger domain 1                                       |
| 2.046118573                      | DNA segment, Chr 9, Wayne State University 90, expressed                              |
| 2.016492906                      | excision repair cross-complementing rodent repair deficiency, complementation group 6 |
| 1.991367614                      | expressed sequence C80258                                                             |
| 1.973734804                      | microtubule associated serine/threonine kinase 2                                      |
| 1.953981121                      | vasohibin 1                                                                           |
| 1.943084942                      | kit ligand                                                                            |
| 1.924419707                      | chemokine (C-X-C motif) receptor 4                                                    |
| 1.922101198                      | neural cell adhesion molecule 1                                                       |
| 1.882293569                      | suprabasin                                                                            |
| 1.859582847                      | RIKEN cDNA 5730419I09 gene                                                            |
| 1.858646074                      | FCH domain only 2                                                                     |
| 1.810351726                      | expressed sequence C76628                                                             |
| 1.786922203                      | phosphatase and tensin homolog                                                        |
| 1.749416594                      | secretion regulating guanine nucleotide exchange factor                               |
| <b>Up in non-pigmented cells</b> |                                                                                       |
| -3.978770747                     | steroid 5 alpha-reductase 2-like                                                      |
| -3.756834213                     | expressed sequence T25656                                                             |
| -2.870838975                     | small nuclear ribonucleoprotein D3                                                    |
| -2.862794085                     | expressed sequence T25656                                                             |
| -2.34866994                      | RIKEN cDNA 4930414L22 gene                                                            |
| -2.309742409                     | centromere protein A                                                                  |
| -2.225585523                     | vacuolar protein sorting 13A (yeast)                                                  |
| -2.220773022                     | transforming growth factor, beta 2                                                    |
| -2.165699485                     | myeloid leukemia factor 1 interacting protein                                         |
| -2.107059637                     | RIKEN cDNA 4933440H19 gene                                                            |
| -2.098114329                     | transforming growth factor, beta 2                                                    |
| -2.005345288                     | sorbitol dehydrogenase                                                                |
| -1.941578554                     | RIKEN cDNA A930005H10 gene                                                            |
| -1.907397033                     | deltex 3-like (Drosophila)                                                            |
| -1.907104277                     | zinc finger protein 110                                                               |
| -1.860407267                     | formin-like 3                                                                         |
| -1.855516149                     | syntaxin 3                                                                            |
| -1.792237                        | zinc finger and BTB domain containing 11                                              |
| -1.773858522                     | mesoderm specific transcript                                                          |
| -1.767461621                     | RAB2B, member RAS oncogene family                                                     |
| -1.75090716                      | SRY-box containing gene 6                                                             |
| -1.686951396                     | zinc finger protein 110                                                               |
| -1.669476593                     | cDNA sequence D10627                                                                  |
